# Supplementary material for: Tetraploidization of Immortalized Myoblasts Induced by Cell Fusion Drives Myogenic Sarcoma Development with DMD Deletion
Source: PubMed Central journal article supplement (PMC7281535; doi:10.3390/cancers12051281), 2020-05-19
Supplement: cancers-12-01281-s001.pdf [file cancers-12-01281-s001.pdf]

# Supplementary Materials: Tetraploidization of Immortalized Myoblasts Induced by Cell Fusion Drives Myogenic Sarcoma Development with *DMD* Deletion

Candice Merle, Noémie Thébault, Sophie LeGuellec, Jessica Baud, Gaëlle Pérot, Tom Lesluyes, Lucile Delespaul, Lydia Lartigue and Frédéric Chibon

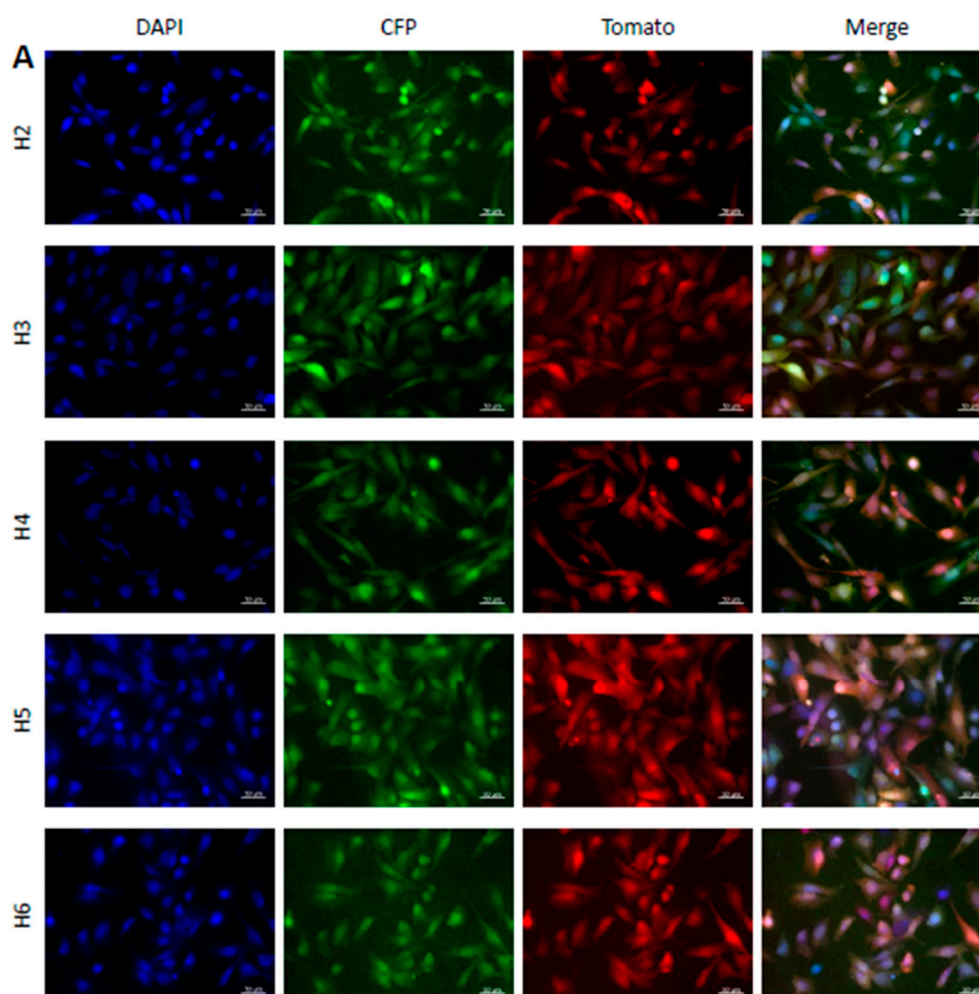

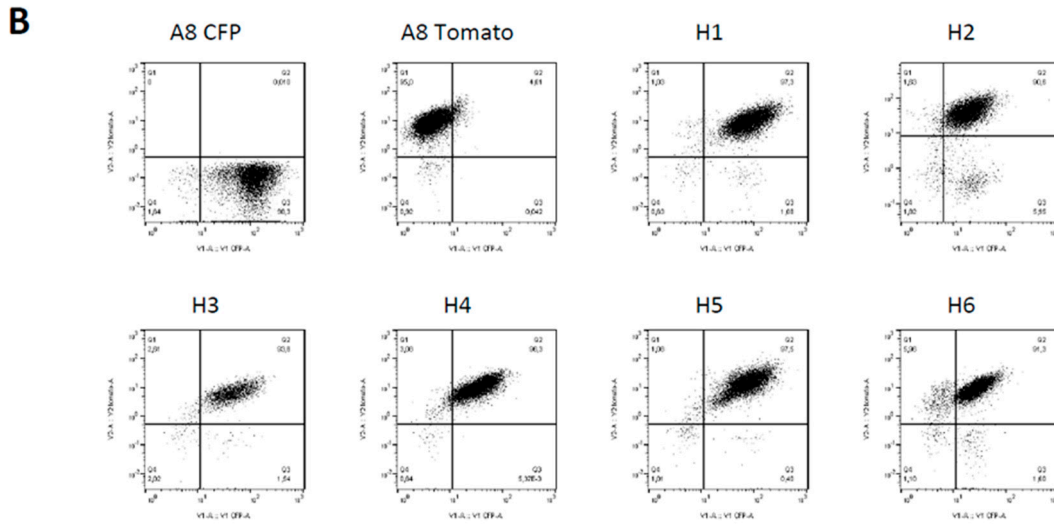

**Figure S1.** Fluorescence analysis. (A) Fluorescence expression of hybrid cell lines H2 to H6. Scale bare = 50  $\mu$ m. (B) Flow cytometry analysis of CFP (x-axis) and tdTomato (y-axis) fluorescence expression in parental and hybrid cell lines.

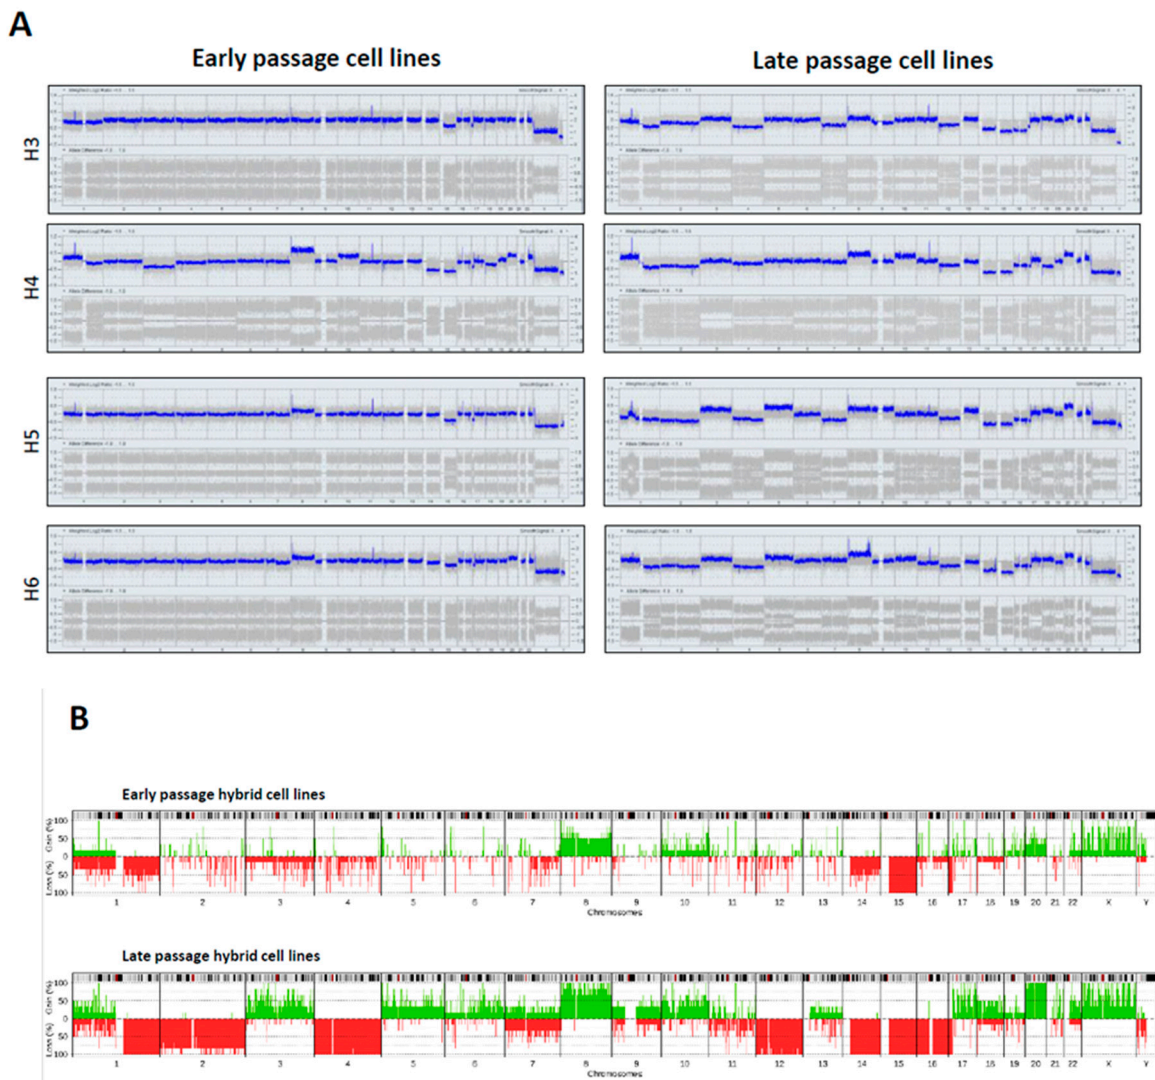

**Figure S2.** Genomic analysis of hybrid cells lines at early and late passages shows evolution of genomes. (A) Genomic profiling of parental and two hybrid cell lines at different passages. x-axis represents chromosome 1 to Y; y-axis represents CNV log(ratio) (upper lane) and allele difference

(lower lane). **(B)** Penetrance plot of CNVs in early (top) and late passage tumors (bottom). x-axis represents chromosomes, y-axis represents proportion of tumors harboring chromosomal gains (green) and losses (red).

**A**

|                | A8 CFP | A8 Tomato | H1  | H2  | H3  | H4  | H5  | H6  |
|----------------|--------|-----------|-----|-----|-----|-----|-----|-----|
| Early passages | 0/5    | 0/5       | 1/5 | 0/5 | 1/4 | 1/5 | 0/5 | 1/5 |
| Late passages  | 0/6    | 0/6       | 2/6 | 4/6 | 4/5 | 4/4 | 0/6 | 4/6 |

**B**

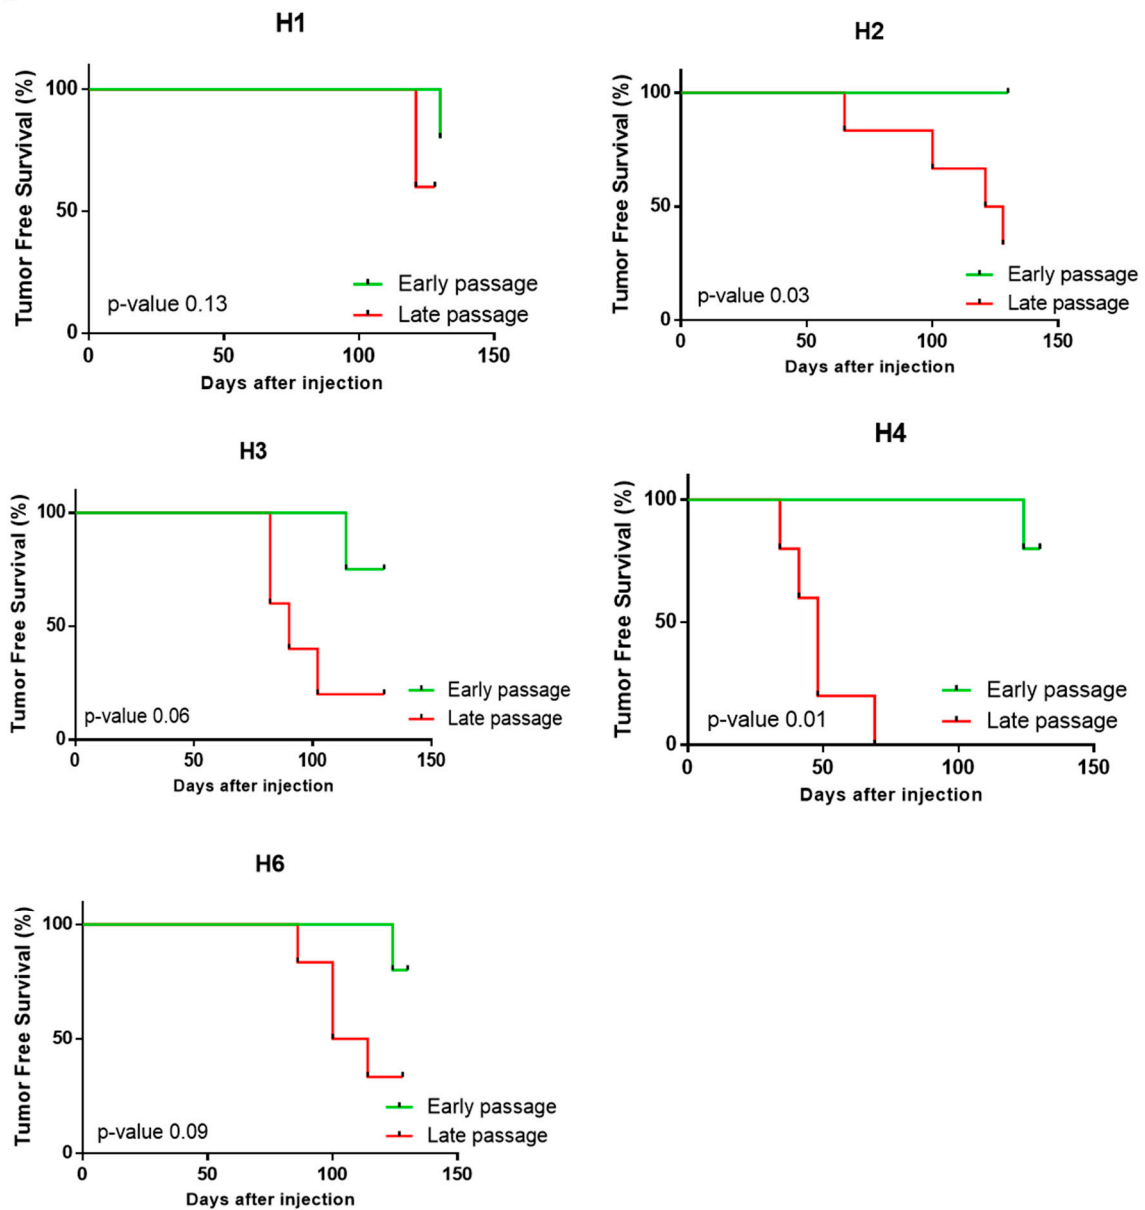

**Figure S3.** Late passage cell lines developed more tumors than early passage cell lines. **(A)** Mice with tumors developed after 130 days post-injection on total number of mice injected. **(B)** Tumor free survival curve for each hybrid cell lines with tumor development capacity comparing early and late passage cell lines.

**A**

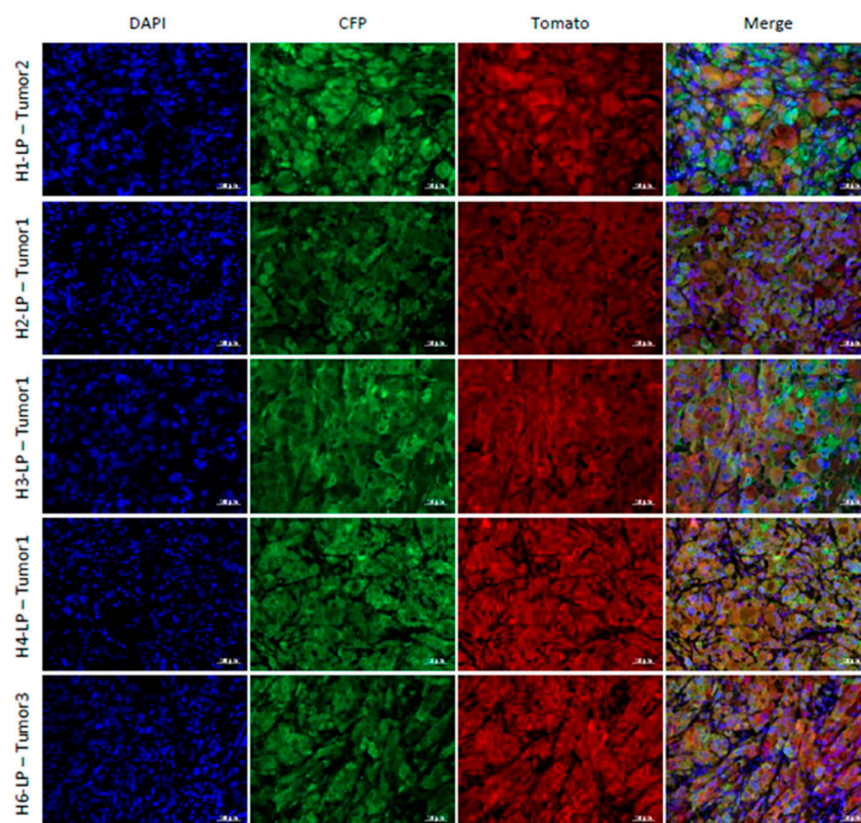

**B**

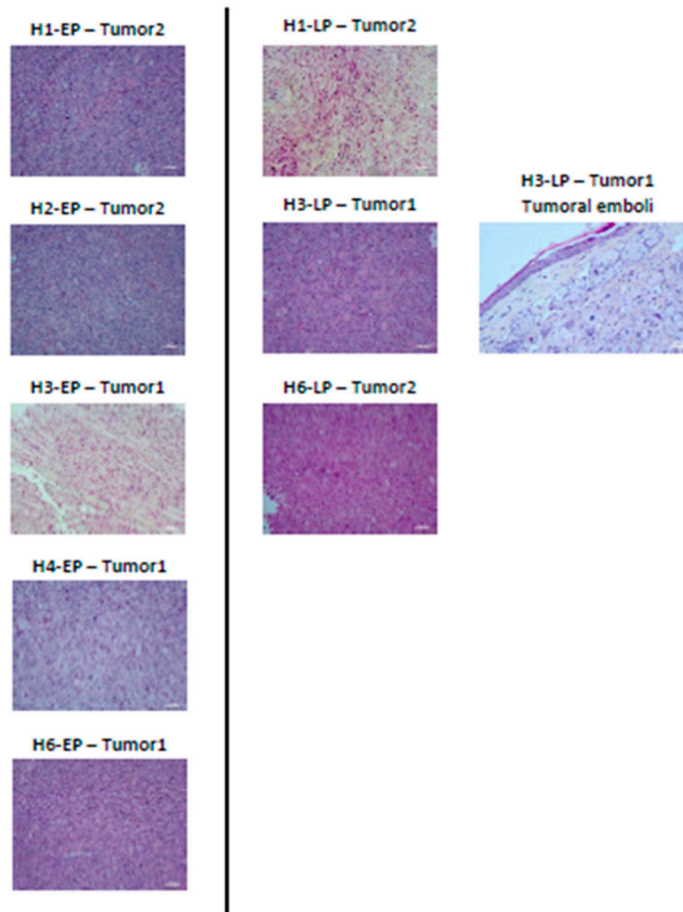

**Figure S4.** Characterization of hybrid tumors developed in mice. (A) Immunofluorescence (CFP and tdTomato) of hybrid tumors. Scale bare = 50  $\mu\text{m}$ . (B) Hematoxylin and eosin staining of hybrid tumors. Scale bar = 100  $\mu\text{m}$ .

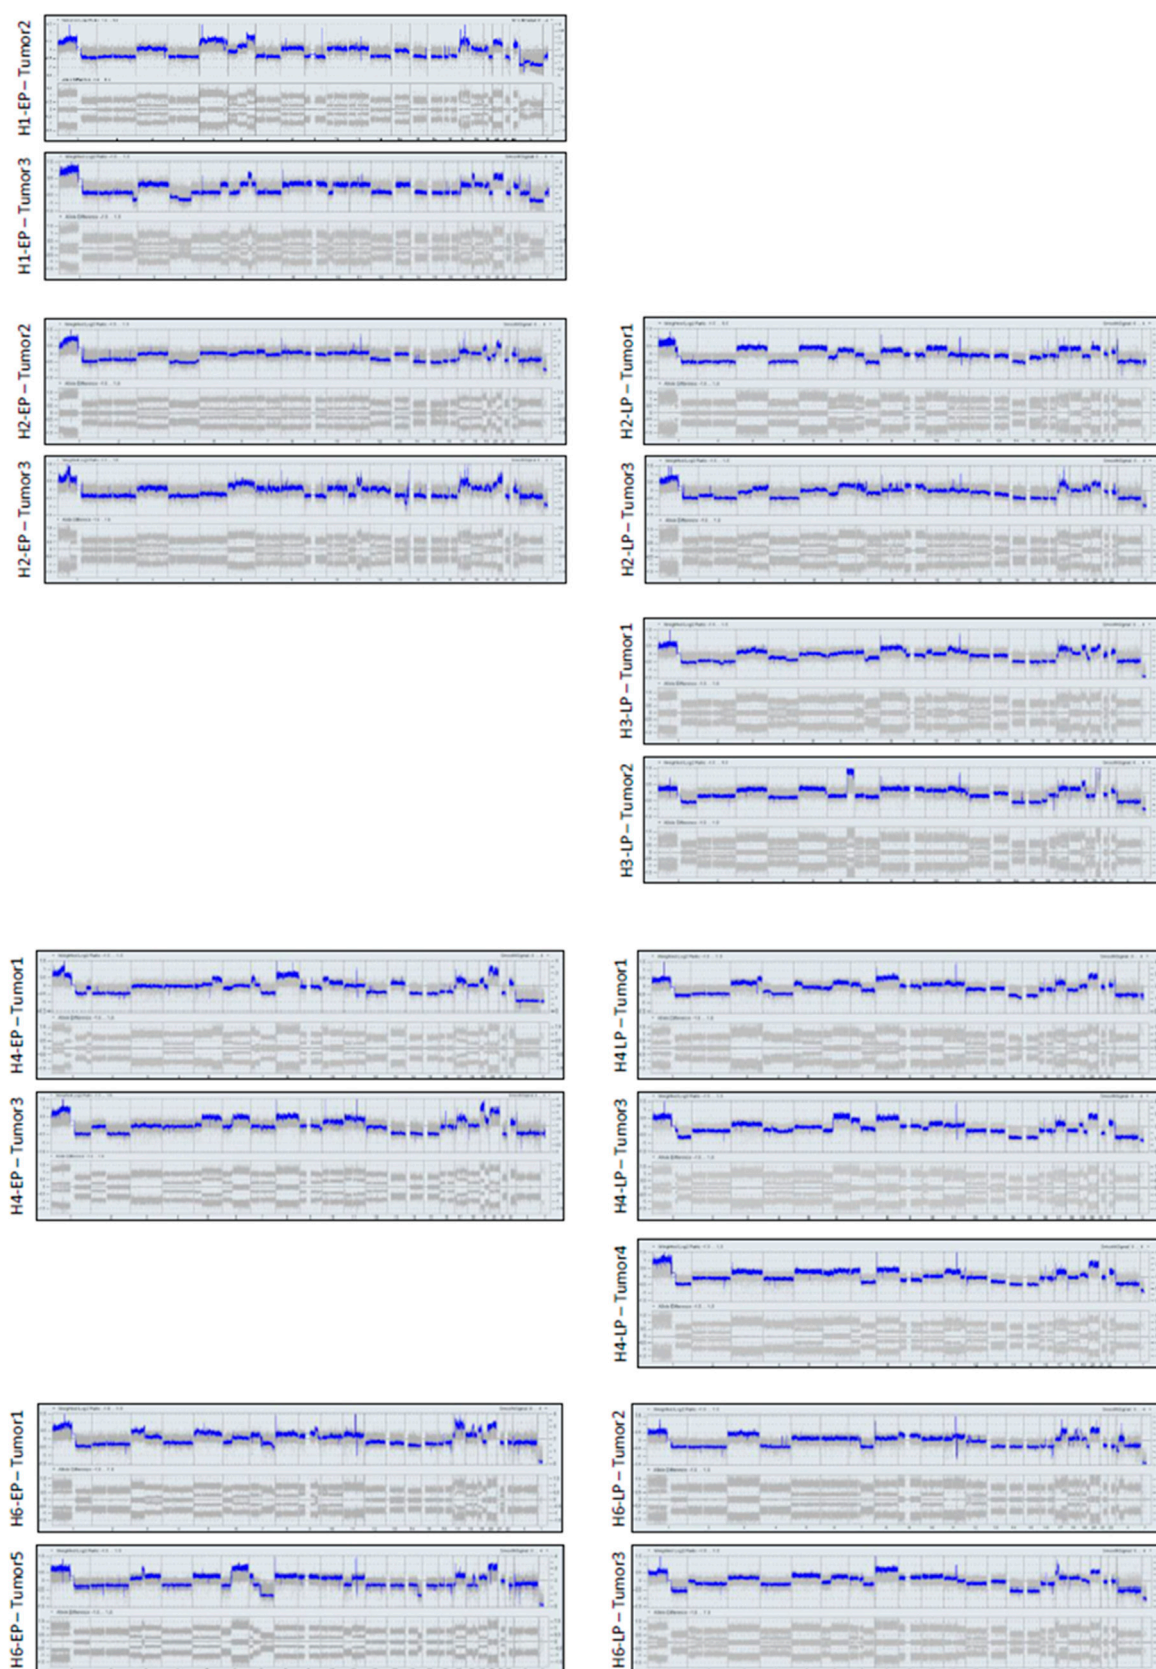

**Figure S5.** Genomic profiling of EP (left) and LP (right) hybrid tumors. x-axis represents chromosome 1 to Y; y-axis represents CNV log(ratio) (upper lane) and allele difference (lower lane).

**A**

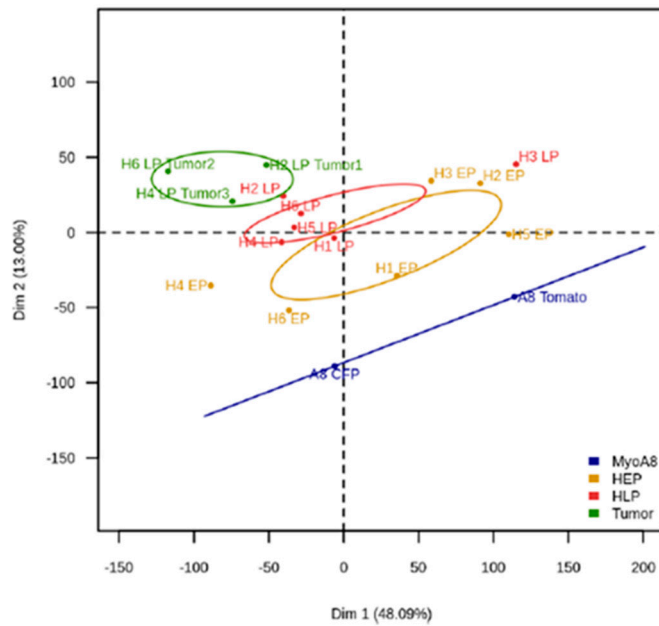

**B**

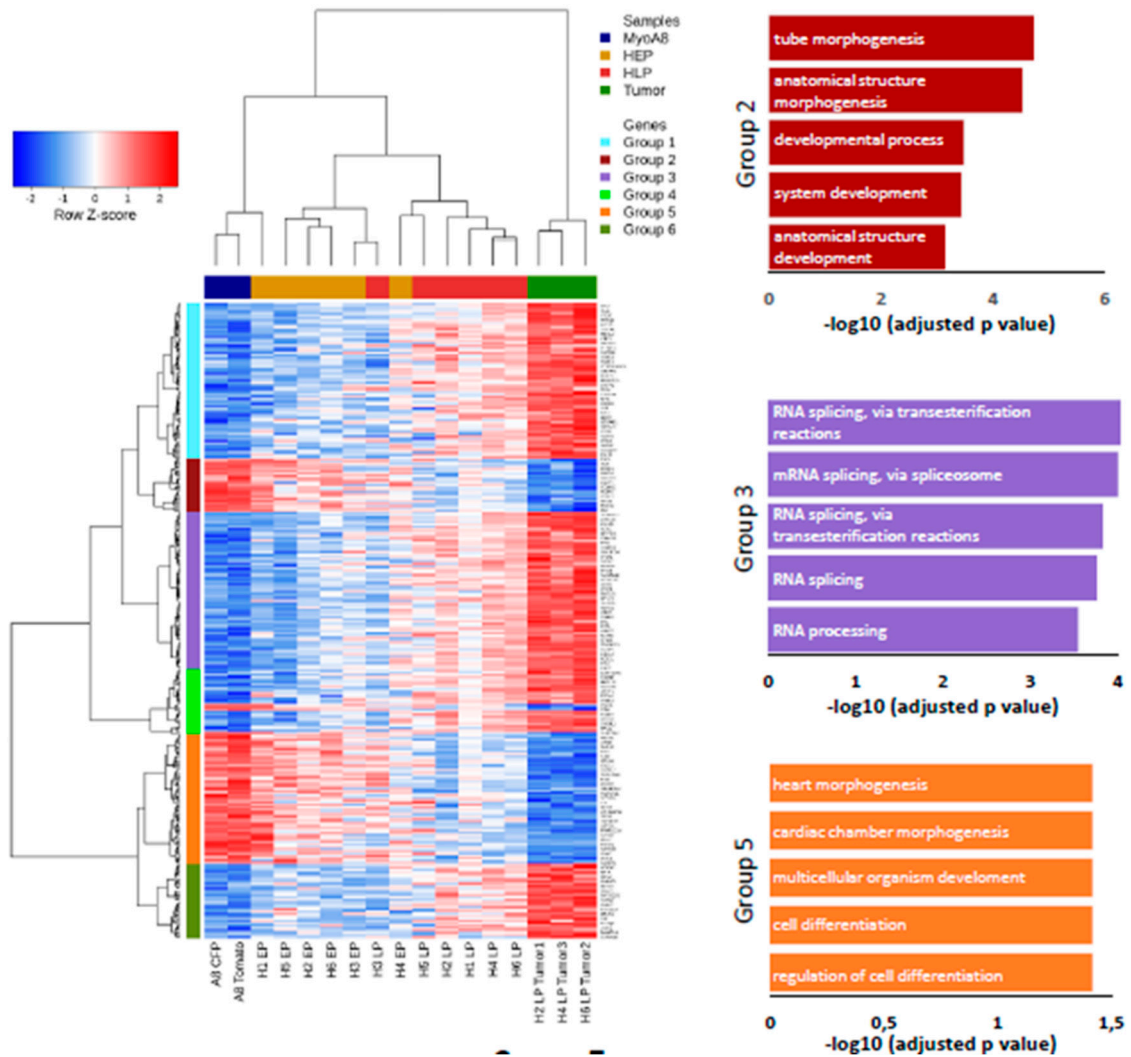

**Figure S6.** Transcriptomic program is remodeled toward oncogenesis. (A) PCA analysis. x-axis corresponds to dimension 1; y-axis corresponds to dimension 2. (B) Cluster analysis of Z-score expression data (left). Functional enrichment analysis with Gene Ontology (right).

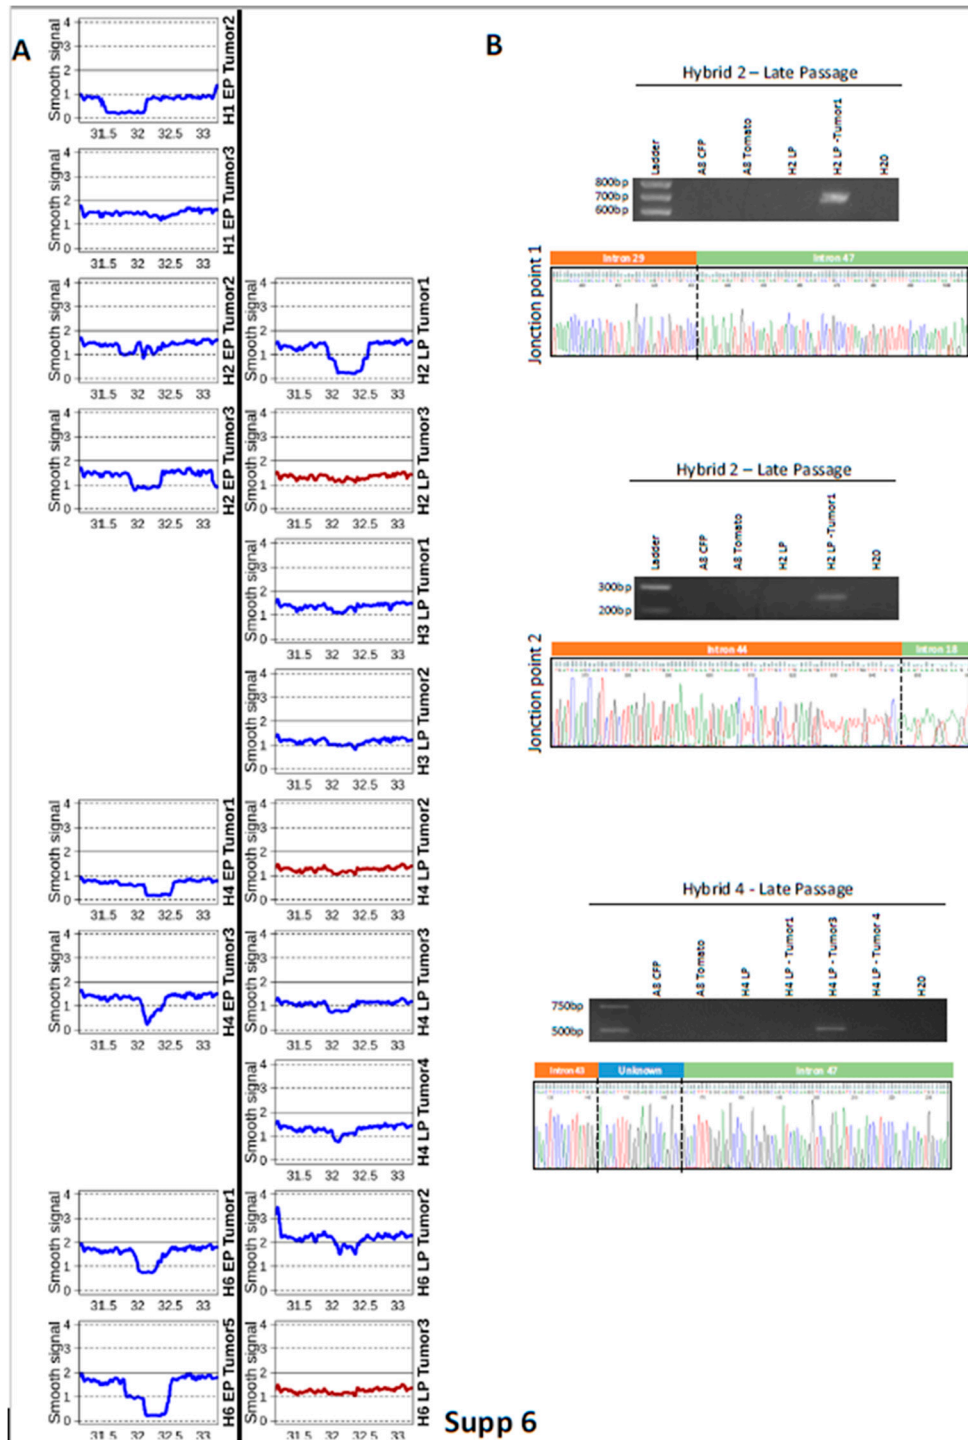

**Figure S7.** Identification and validation of *DMD* deletions in hybrid tumors. (A) Smooth signal (average  $\log_2(\text{ratio})$ ) of array CGH for *DMD* gene. Left panel corresponds to EP tumors and right panel to LP tumors. Blue lines are for tumor with detected *DMD* deletion by array-CGH, and red lines for tumor without *DMD* deletion observed. (B) Agarose gel (upper panel) and electropherograms obtained by Sanger sequencing (lower panel) showing PCR products of fusion points after break points in *DMD*.

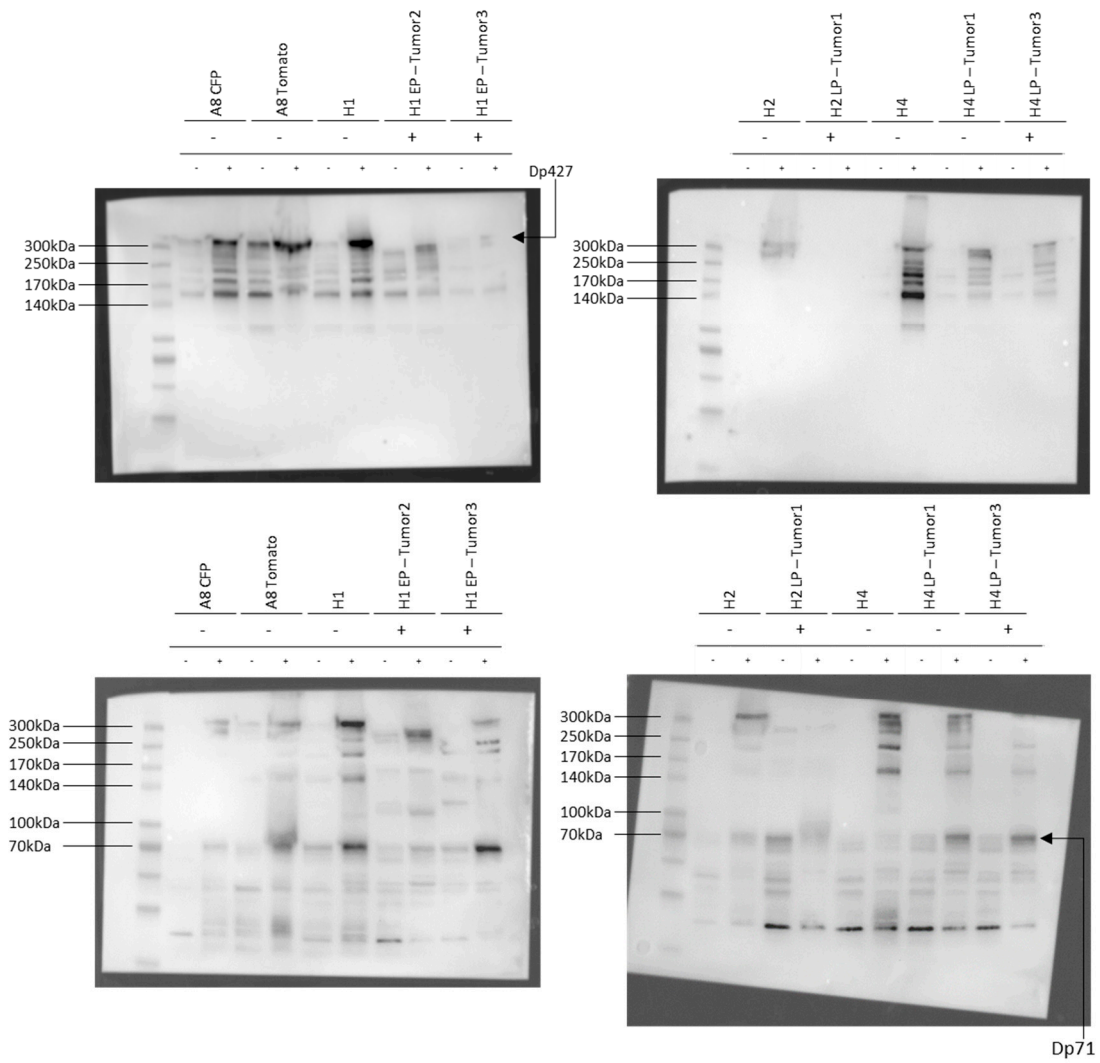

**Figure S8.** Signal detection on the whole membrane shown on Figure 6A. Dp427 and Dp71 expression in parental and hybrid cell lines. Actin was used as loading control.



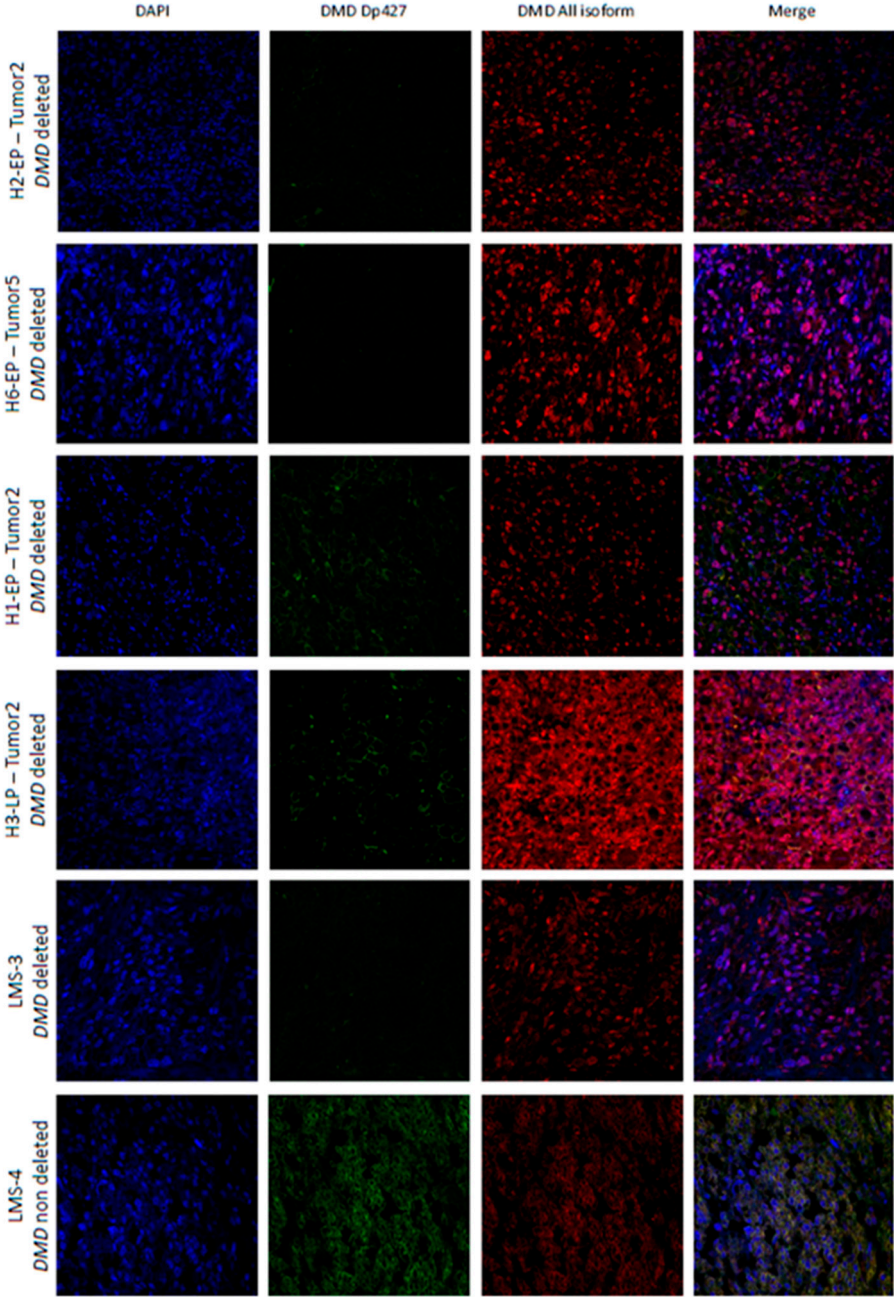

**Figure S9.** Detection of Dp427 and other dystrophin isoforms by immunofluorescence analysis. Green fluorescence corresponds to Dp427, red to all dystrophin isoform and blue is DAPI to detect nucleus.

Table S1

| Group 1    |          | Group 2 | Group 3  |          | Group 4  | Group 5   |          | Group 6     |
|------------|----------|---------|----------|----------|----------|-----------|----------|-------------|
| NFYC       | NDN1     | ENC1    | MFN2     | ZNF259   | EIF31    | CSRNP2    | EPN2     | SPNS2       |
| TTC4       | SHMT1    | SPRY2   | ZCCHC17  | RNF220   | PSMB7    | RBMS2     | ZFP90    | NFKBIE      |
| NADK       | FRG2B    | TNS1    | LYPLA2   | PPIE     | PARK7    | HERPUD2   | SMAD6    | RBK5        |
| DFFA       | FRG2     | PEX11B  | LRRG47   | MED24    | CDC20    | ARSB      | TMEM169  | RELB        |
| MED8       | UBLAD1   | BACE1   | ADPRHL2  | TAPBP    | ATP6V0B  | ATP8B2    | MLPH     | SREBF1      |
| YRDC       | C1orf109 | PDGFA   | KLHL21   | ATAD3A   | SH3GL1   | ZADH2     | AGTR1    | GNAZ        |
| NCDN       | AP4B1    | LAMB1   | EFHD2    | RPA2     | MRPL20   | FOXN3     | KCNJ15   | CPT2        |
| TRDM25     | NFS1     | PITX2   | UQCC     | HDAC1    | EBNA1BP2 | FZD7      | PPAPDC1A | NMNAT1      |
| CMTM7      | TOE1     | CNOT11  | SLC25A10 | TMEM222  | SZRD1    | FZD1      | STK32B   | MED26       |
| KAT2A      | H0XB4    | TTL     | MRPS23   | WBP2     | CIQBP    | NTM       | CASQ2    | MGNK1       |
| MAP3K14    | DHR57B   | FARP1   | AATF     | SNRNP40  | NUDC     | DLC1      | SGCG     | ORC1        |
| AKAP8L     | ABR      | DDR1    | C11orf48 | PSMB2    | MRPL37   | CDH11     | MYH7     | TRAF1       |
| CLUH       | LPCAT3   | COL4A2  | SMIM4    | UBE2J2   | NOP56    | ADRA2C    | TCF7L1   | SLC38A3     |
| FMNL1      | KRI1     | COL4A1  | PPIH     | BRE      | CDC25B   | LDOC1     | PRRX2    | RARRES3     |
| FGGY       | AKAP8    | FKBP9   | DPH2     | RER1     | DDOST    | COL11A1   | CDH4     | MANEAL      |
| YIPF1      | MED9     | SLC20A1 | TOMM34   | PEF1     | ATPIF1   | TWIST2    | SORBS2   | ASTN2       |
| NUBP1      | AKAP1    | PXDC1   | GTF2F1   | PRPF8    | NDUFB4   | PTPRM     | MATN3    | CCDC103     |
| DHDDS      | GRIPAP1  | CTHRC1  | TRAPPC4  | WDR77    | PRDX4    | TNFAIP8L3 | CGB2     | HMHA1       |
| BRD8       | LDLRAP1  | RHOB    | NABP2    | EMC3     | STIP1    | GNG2      | IL15     | MORN1       |
| PTPMT1     | UBXN11   | ANTXR1  | SF3A1    | NOP16    | PSMC5    | PKIA      | DISC1    | KIAA1217    |
| DDX54      | SLC2A8   | FSCN1   | CTRHA    | SDHB     | LRRCS9   | TSHZ1     | MEIS1    | DDO         |
| SUPT6H     | LGMN     | IGFBP3  | SRSF4    | SF3A3    | PSAT1    | BMPR2     | GABBR1   | MTUS1       |
| GCAT       | PCBD1    | FNI     | CASC3    | MRPS15   | COL5A1   | PTPN21    |          | OSR2        |
| ABHD8      | ASAP3    |         | FN3KRP   | TRAPPC3  | RTN4     | TMEM185B  |          | IL34        |
| NME1-NME2  | PLA2G16  |         | C3orf37  | TMEM106C | RPS8     | SPRED2    |          | CD33        |
| HMGCL      | LRIG1    |         | FTSJ3    | WASF2    | RPL11    | CCDC71L   |          | KCNQ4       |
| CTNBP1     | METT17B  |         | PGAMS    | AK2      | ENO1     | DGKA      |          | IRAK2       |
| ST6GALNAC4 | TRDM47   |         | SLC25A38 | EIF4A3   | SERPINE1 | SFT2D3    |          | ASIC1       |
| NFKB2      | PSMB9    |         | DNAJC11  | PGM1     |          | CCN       |          | PPAN-P2RY11 |
| WRAP73     | SLC12A7  |         | CCDC137  | NOC2L    |          | IL11      |          | BALAP2L1    |
| TAP2       | MT1F     |         | NOP2     | MRT04    |          | ZBTB39    |          | TMCO4       |
| PEX14      | ENHO     |         | OGFR     | ERI3     |          | IGF1R     |          | TSPAN18     |
| KTI12      | SFRP5    |         | BSDC1    | RCC1     |          | THUMP2    |          |             |
| MYBBP1A    |          |         | STAT3    | KIF2C    |          | ARHGAP31  |          |             |

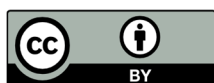

© 2020 by the authors. Submitted for possible open access publication under the terms and conditions of the Creative Commons Attribution (CC BY) license (<http://creativecommons.org/licenses/by/4.0/>).
